# Supplementary material
Source: publisher figshare collection journal article supplement (https://wiley.figshare.com/articles/dataset/_/3521639)
Supplement: Supplementary file 1 [file 1]

Principal Pollinators of Dalechampia Species  
with Location of Study Sites and Dates of Study

Supplementary Material for:

Armbruster, W.S. 1988. Multilevel comparative analysis  
of the morphology, function, and evolution of Dalechampia blossoms. Ecology 69: 1746-1761

W. Scott Armbruster  
Department of Biology and Wildlife  
and  
Institute of Arctic Biology  
University of Alaska Fairbanks  
Fairbanks, AK 99775-7000

Supplemental Table 1. Species names, population locations, dates of observations, and principal pollinators for Dalech  
multilevel comparative analysis presented in Armbruster (1988). Principal pollinators are reported  
more hours of observation. They are those insects that had the highest pollinator importance (PI)  
where  $f_a$  is the frequency of contact with the anthers,  $f_s$  is the frequency of contact with stigma  
rate ( $\text{visits} \cdot \text{inflorescence}^{-1} \cdot \text{hr}^{-1}$ ). When two species had similar PI scores, both species are re

| Species and Author                       | Location Population                                                                  | Dates of Study           | Number<br>days o<br>Observat |
|------------------------------------------|--------------------------------------------------------------------------------------|--------------------------|------------------------------|
| 1. <u>Dalechamuia affinis</u> Mull. Arg. | 1. <b>Cacau</b> Pirera, south bank of Rio Negro<br>opposite Manaus, Amazonas, Brazil | 10-25 Sept. 1978         | 6                            |
| 2. <u>D. armbrusteri</u> Webster         | 2. Quadra "D" CEPLAC grounds,<br>E of Itabuna, Bahia, Brazil                         | 28 July -<br>5 Aug. 1984 | 8                            |
| 3. <u>D. caneronioides</u> Baill.        | 3. 6 km SSE Brasilia, D.F., Brazil                                                   | 20-29 Aug. 1984          | 6                            |
|                                          | 4. 10 km E Brasilia, D.F., Brazil                                                    | 18 Aug. 1984             | 1                            |
|                                          | 5. 8 KM SSE Brasilia, D.F., Brazil                                                   | 22-29 Aug. 1984          | 6                            |
| 4. <u>D. cissifolia</u> Poepp. & Endl.   | 6. 47 km S Santo Domingo, Ecuador                                                    | 11 July -<br>2 Aug. 1979 | 7                            |
| 5. <u>D. canescens</u> H.B.K.            | 7. 5 km SE La <b>Tenida</b> , Tachira, Venezuela                                     | 20 Dec. 1985             | 1                            |
|                                          | 8. 2 km E Los Angeles <b>del</b> Tucuco,<br>Zulia, Venezuela                         | 26 Dec. 1985             | 1                            |

|                                                   |                                                                                      |                                                                                             |    |                                                                                                                   |
|---------------------------------------------------|--------------------------------------------------------------------------------------|---------------------------------------------------------------------------------------------|----|-------------------------------------------------------------------------------------------------------------------|
| 6. <i>D. dioscoreifolia</i> Poepp. & Endl.        | 9. K 15 Pipeline Road, Parque Nacional Soberania, Panama                             | 9-27 Jan. 1980                                                                              | 7  | <u><i>Eulaema cingulata</i></u><br><u><i>Eulaema meriana</i></u>                                                  |
| 7. <i>D. ficifolia</i> Lam.                       | 10. Reserva Pau Brazil, 15 k W Porto Seguro, Bahia, Brazil                           | 4-27 July 1984                                                                              | 18 | ----                                                                                                              |
| 8. <i>D. heteromorpha</i> Pax & Hoffm.            | 11. 3 km E Golfito, Costa Rica                                                       | 19-27 July 1977                                                                             | 5  | <u><i>Hypanthidium panamense</i></u>                                                                              |
|                                                   | 12. K 13 Pipeline Rd, Parque Nacional Soberania, Panama                              | 9-27 Jan. 1980                                                                              | 7  | <u><i>Hypanthidium panamense</i></u>                                                                              |
|                                                   | 13. 5 km SW Palenque, Mexico                                                         | 19-25 Feb. 1978                                                                             | 4  | ----                                                                                                              |
| 9. <i>D.</i> aff. <i>ilheotica</i> Wawra          | 14. Reserva Pau Brasil, 15 k W Porto Seguro Bahia, Brazil                            | 4 July - 7 Aug. 1984                                                                        | 22 | <u><i>Euglossa</i></u> sp.                                                                                        |
| 10. <i>D. juruana</i> Ule                         | 15. Yanamano, 60 km NE Iquitos, Peru                                                 | 27 Aug. - 5 Sept. 1978                                                                      | 7  | <u><i>Euglossa</i></u> sp. nov.<br>RD 1154                                                                        |
| 11. <i>D.</i> sp. nov. aff. <i>juruana</i>        | 16. 14 km NE El Nula, Apure, Venezuela                                               | 25 Dec. 1985                                                                                | 1  | ----                                                                                                              |
| 12. <i>D. megacarpa</i> Armbruster                | 17. 86 km S El Dorado, Bolivar, Venezuela                                            | 8-11 Dec. 1985                                                                              | 3  | <u><i>Euglossa</i></u> sp.                                                                                        |
| 13. <i>D. magnistipulata</i> Webster & Armbruster | 18. Estacion de Biologia Tropical "Los Tuxtlas," 25 km NE Catemaco, Veracruz, Mexico | 10-13 Sept. 1975, 18 Aug. - 4 Sept. 1976, 28-29 Aug. 1977, 16-17 Feb. 1978, 21-23 Mar. 1978 | 27 | <u><i>Eufriesea</i></u> aff.<br><u><i>surinamensis</i></u><br><u><i>Euglossa</i></u><br><u><i>viridissima</i></u> |
| 14. <i>D.</i> cf. <i>parvifolia</i> Lam.          | 19. Endabash Guard Station, Lake Manyara National Park. Tanzania                     | 20 July - 7 Aug. 1981                                                                       | 14 | <u><i>Heriades</i></u> aff.<br><u><i>spiniscutis</i></u>                                                          |
|                                                   | 20. Headquarters Area, Lake Manyara National Park, Tanzania                          | 20 July - 7 Aug. 1981                                                                       | 15 | <u><i>Heriades</i></u> aff.<br><u><i>spiniscutis</i></u>                                                          |

|                                              |                                                                                      |                                                                                                |    |                                                                          |
|----------------------------------------------|--------------------------------------------------------------------------------------|------------------------------------------------------------------------------------------------|----|--------------------------------------------------------------------------|
| 15. <u>D. schippii</u> Standley              | 21. 2 km E Melinda Station, Belize                                                   | 30 Nov. - 3 Dec. 1979                                                                          | 2  | <u>Euglossa</u><br><u>viridissima</u>                                    |
| 16. <u>D. schottii</u> Greenm.               | 21. 144 km E Esgarcega, Campeche, Mexico                                             | 19-29 Nov. 1979                                                                                | 2  | <u>Trigona</u> sp.<br><u>Hypanthidium</u><br><u>melanopterum</u>         |
| 17. <u>D. stipulacea</u> Mull. Arg.          | 23. 13 km S La <b>Tendida</b> , Tachira, Venezuela                                   | 17-18 Oct. 1978                                                                                | 2  | <u>Eulaema</u><br><u>cingulata</u>                                       |
| 18. <u>D. stipulacea</u> var. <u>minor</u>   | 24. 5 km E Campinas, Sao Paulo, Brazil                                               | 14 Aug. 1984                                                                                   | 1' | <u>Euglossa</u><br><u>melanotricha</u>                                   |
| 19. <u>D. spathulata</u> (Scheidw.) Baill.   | 24. Estacion de Biologia Tropical "Los Tuxtlas," 25 km NE Catemaco, Veracruz, Mexico | 10-13 Sept. 1975,<br>18 Aug. - 4 Sept. 1976, 28-29 Aug. 1977, 16-17 Feb. 1978, 21-23 Mar. 1978 | 26 | <u>Eulaema</u><br><u>polychroma</u>                                      |
| 20. <u>D. tiliifolia</u> Lam.                | 26. 13 km SE San Isidro, Costa Rica                                                  | 4 Jan. 1980                                                                                    | 1  | ----                                                                     |
|                                              | 27. K 15 Pipeline Road, Parque Nacional Soberania, Panama                            | 9-27 Jan. 1980<br>5-9 Jan. 1986                                                                | 10 | <u>Eulaema</u><br><u>cingulata</u>                                       |
|                                              | 28. Never Delay, Belize                                                              | 3-4 Feb. 1978                                                                                  | 2  | <u>Eulaema</u><br><u>cingulata</u>                                       |
|                                              | 29. 8 km SW Palenque, Chiapas, Mexico                                                | 19-25 Feb. 1978                                                                                | 5  | ----                                                                     |
|                                              | 30. 5 km W Montealban, Carabobo, Venezuela                                           | 30 Nov. 1985                                                                                   | 1  | ----                                                                     |
| 21. <u>D.</u> sp. aff. <u>triphvlla</u> Lam. | 31. Brownsberg Nature Park, Suriname                                                 | 17-29 July 1979,<br>12 Nov. 1985                                                               | 10 | <u>Hvpanthidium</u> sp.                                                  |
| 22. <u>D. websteri</u> Armbruster            | 32. OTS Reserva "La Selva," Costa Rica                                               | 18-21 Dec. 1979,<br>4-6 Feb. 1980                                                              | 7  | <u>Euglossa</u> sp.<br><u>Hvnanthidium</u> sp.<br>nov. " <b>nigrum</b> " |

|                           |                                                                                           |                                               |    |                                                  |
|---------------------------|-------------------------------------------------------------------------------------------|-----------------------------------------------|----|--------------------------------------------------|
| 23. <u>D. scandens</u> L. | 33. 2 km E San Jose de la Gracia, Oaxaca, Mexico                                          | 6 Sept. 1976,<br>28 June, 31 Aug.<br>1977     | 3  | <u>Hypanthidium</u><br><u>mexicanum</u>          |
|                           | 34. 10 km S Felipe Carillo Puerto, Quintana Roo, Mexico                                   | 27 Feb. 1978,<br>2 Mar. 1978,<br>27 Nov. 1979 | 3  | <u>Euglossa</u> sp.                              |
|                           | 35. 1 km W Liberia, Costa Rica                                                            | 14 Aug. 1977,<br>15 Dec. 1979                 | 2  | <u>Euglossa</u> sp.                              |
|                           | 36. <b>Cacau</b> Pirera, south bank of Rio Negro, opposite Manaus, <b>Amazonas</b> Brazil | 10-25 Sept. 1978                              | 6  | <u>Hypanthidium</u> aff.<br><u>melantopternm</u> |
|                           | 37. Near Madden Dam Spillway, "Canal Zone," Panama                                        | 9 Jan. 1980,<br>14 Dec. 1983                  | 2  |                                                  |
|                           | 38. km 13 Pipeline Road, Parque <b>Nacional</b> Soberania, Panama                         | 9-27 Jan. 1980                                | 7  | <u>Hypanthidium</u><br><u>panamense</u>          |
|                           | 39. 45 km S Santo Domingo, Ecuador                                                        | 11 Jul. - 2 Aug.<br>1978                      | 11 | <u>Eulaema</u> <u>cingulata</u>                  |
|                           | 40. Tulum, Quintana Roo, Mexico                                                           | 23-26 Nov. 1979                               | 2  | <u>Euglossa</u><br><u>viridissima</u>            |
|                           | 41. UCV campus, <b>Maracay</b> , Aragua, Venezuela                                        | 27-28 Nov. 1985                               | 2  | <u>Hypanthidium</u> sp.                          |
|                           | 42. <b>Jardin Botanico</b> , Caracas, D.F.                                                | 24 Nov. 1985                                  | 1  | <u>Trigona</u> aff. <u>jaty</u>                  |
|                           | 43. 40 km E El <b>Palmar</b> , Bolivar, Venezuela                                         | 2-5 Dec. 1985                                 | 3  | <u>Hypanthidium</u> sp.                          |

---

‘Additional observational data from Sazima and Sazima 1985

## Literature Cited

- Armbruster, W.S. 1988. Multilevel comparative analysis of the morphology, function, and evolution of Dalechampia blossoms. *Ecology* 69: 1746- 1761.
- Sazima, M., and I. Sazima. 1985. Biologia floral de Dalechampia stipulacea (Euphorbiaceae) e sua polinização por Euglossa melanotricha (Apidae). *Revista Brasileira de Biologia* 45: 85-93.
